# Supplementary material for: Aminated graphite oxides and their composites with copper-based metal–organic framework: in search for efficient media for CO2 sequestration
Source: Royal Society of Chemistry journal article supplement (doi:10.1039/c3ra40817e), 2013-01-01
Supplement: c3ra40817e.pdf [file c3ra40817e.pdf]

# **Aminated graphite oxides and their composites with copper-based metal–organic framework: in search for efficient media of CO<sub>2</sub> sequestration**

**Yunxia Zhao<sup>1,2</sup>, Mykola Seredych<sup>1</sup>, Qin Zhong<sup>2</sup>, and Teresa J. Bandosz<sup>1</sup>**

*<sup>1</sup>The City College of New York*

*160 Convent Avenue, New York, NY 10031 (USA)*

*<sup>2</sup>School of Chemical Engineering*

*Nanjing University of Science and Technology, Nanjing, 210094 (PR China)*

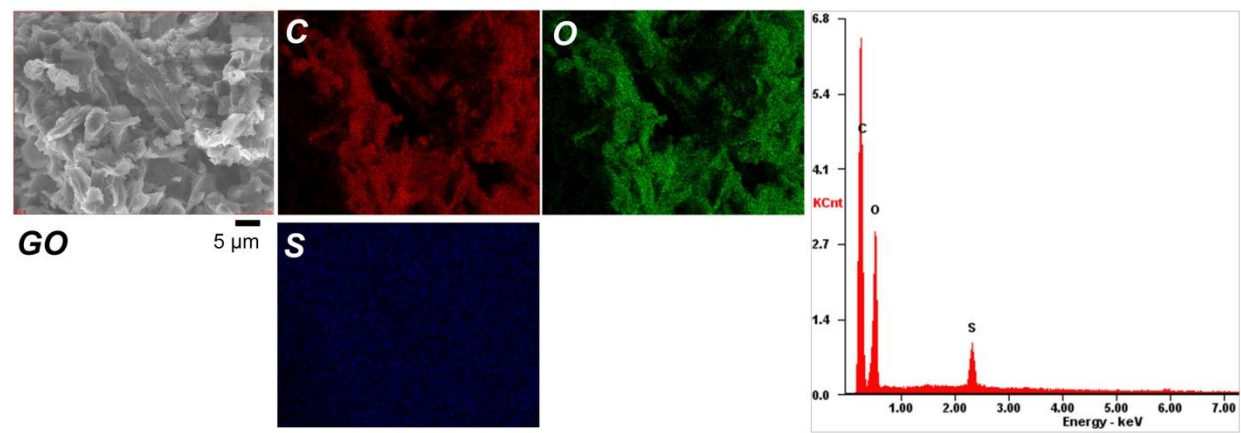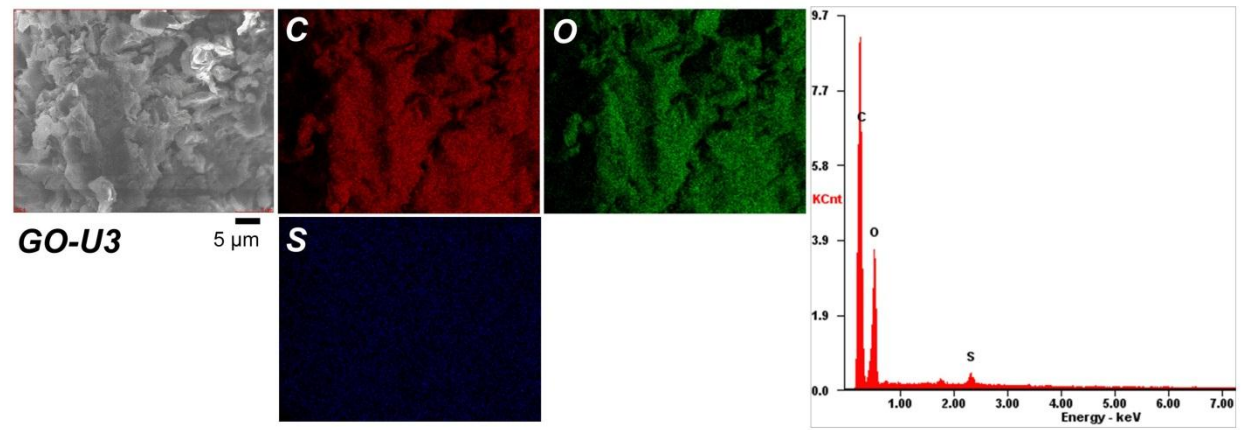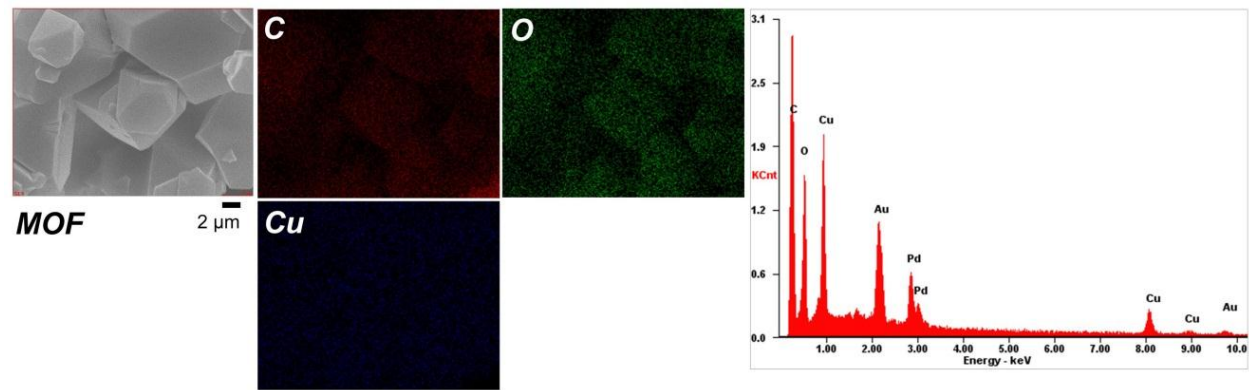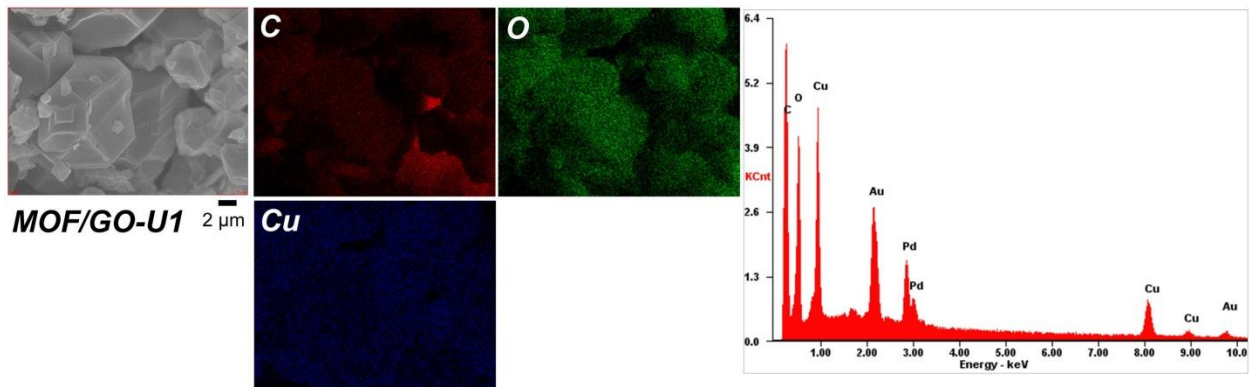

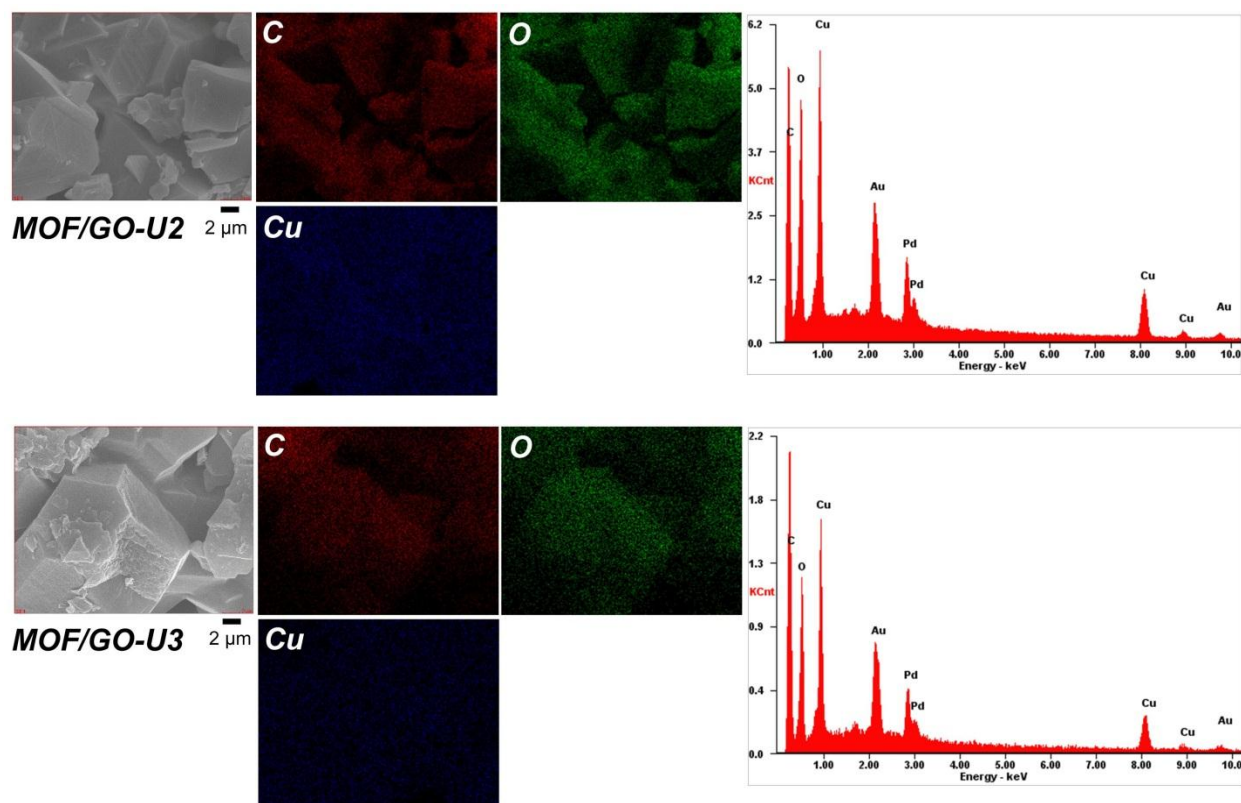

**Fig. S1.** EDX maps of elements for GO, GO-U3, MOF and MOF/GO-U. Only maps for the particular areas are presented. The content of copper was evaluated based on the maps of elements collected from four spots.

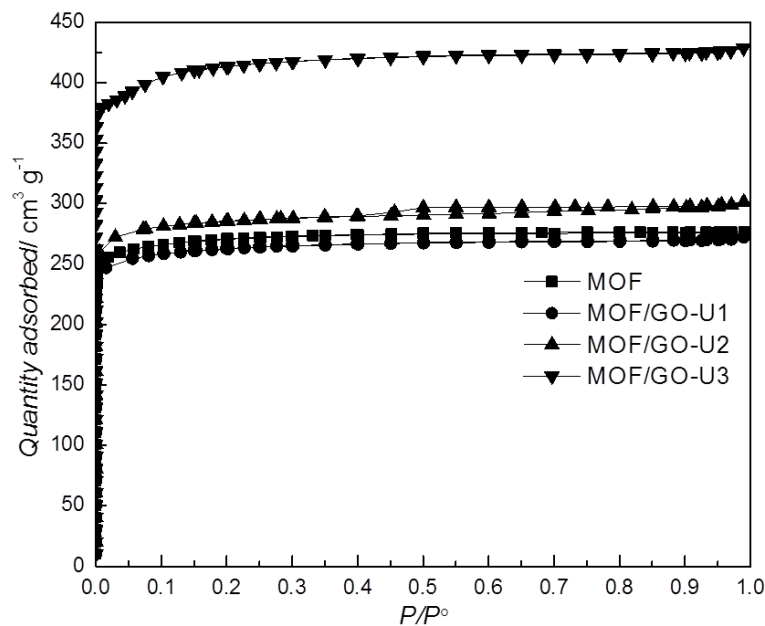

**Fig. S2.** Nitrogen adsorption isotherms for parent MOF and the composites.

**Table S1.** Results of C, H and N elemental analysis (in weight %).

| Sample | C     | H    | N    | O <sup>[a]</sup> |
|--------|-------|------|------|------------------|
| GO     | 63.13 | 1.59 | -    | 35.28            |
| GO-U1  | 65.20 | 1.47 | 0.21 | 33.33            |
| GO-U2  | 67.00 | 1.46 | 0.41 | 31.54            |
| GO-U3  | 65.09 | 1.59 | 0.59 | 33.32            |

<sup>[a]</sup>The content of oxygen is calculated from the difference to 100 %.

**Table S2.** Parameters of the surface area and porous structure for MOF and MOF/GO-U.

| Sample    | $S_{\text{BET}}$ ( $\text{m}^2 \text{g}^{-1}$ ) | $V_t$ ( $\text{cm}^3 \text{g}^{-1}$ ) | $V_{\text{mic}}$ ( $\text{cm}^3 \text{g}^{-1}$ ) | $V_{\text{mic}}/V_t$ (%) |
|-----------|-------------------------------------------------|---------------------------------------|--------------------------------------------------|--------------------------|
| MOF       | 892                                             | 0.428                                 | 0.379                                            | 89                       |
| MOF/GO-U1 | 764                                             | 0.370                                 | 0.329                                            | 89                       |
| MOF/GO-U2 | 936                                             | 0.466                                 | 0.406                                            | 87                       |
| MOF/GO-U3 | 1367                                            | 0.663                                 | 0.572                                            | 86                       |
